# Supplementary material for: IAQMS-street v2.0: a two-way coupled regional-urban–street-network model system for Beijing, China
Source: Copernicus journal article supplement (doi:10.5194/gmd-2023-5), 2023-03-24
Supplement: Supplementary file [file gmd-2023-5-AC1-supplement.pdf]

**Re: We thank the reviewers for your careful read and thoughtful comments on our manuscript. We have carefully taken your comments into considerations in preparing our revision, and below marked in blue is our response to your comments point by point, or you can see the revised manuscript for more details. Thanks again for your comments.**

**Specific:**

**Reviewer 1:** General comments: This study presents a new version of the regional urban road network air quality modelling system IAQMS-street v2.0 to simulate urban background and road network pollution. The manuscript is generally well organised, at this stage the reviewer has a positive attitude towards its publication. However, there are still some points regarding the numerical conditions that should be further explained and modified. The detailed comments of the reviewer are as follows:

Specific comments:

1. Line 163 “The fixed time step for interfacing between NAQPMS and MUNICH was 20 min, i.e., the same as that of the regional model.” Is the time step 20 min also for MUNICH? As this study focuses on pollutant diffusion and chemical reaction at the street scale (100 m). The reviewer thinks that 20 min is too long. For example, the previous study on MUNICH with chemical reactions used a time step of 100 s. <https://doi.org/10.5194/gmd-15-7371-2022>. Please justify that the simulation results based on 20 min can achieve similar simulation accuracy with a smaller time step (e.g. 5 min). In addition, a sensitivity test should also be carried out on the time step for the interface between NAQPMS and MUNICH (e.g. 5 min).

Re: Thank you for reading this manuscript carefully and asking questions. Your comments are critical to improve the content of the manuscript. In MUNICH, the time step was setting as 1200s (20min) to corresponding with the time step in NAQPMS. In previous study, the performance of MUNICH with different time steps (100s and 600s) on street and background has been evaluated in Paris (Figure R1 and R2). In Figure R1, the results showed that the street concentrations of NO<sub>2</sub> and NO are numerically stable and independent of the choice of the time step in MUNICH with nonstationary approaches, and the nonstationary approaches decreased the influence on background concentration with different time step in Figure R2 (Lugon et al., 2020).

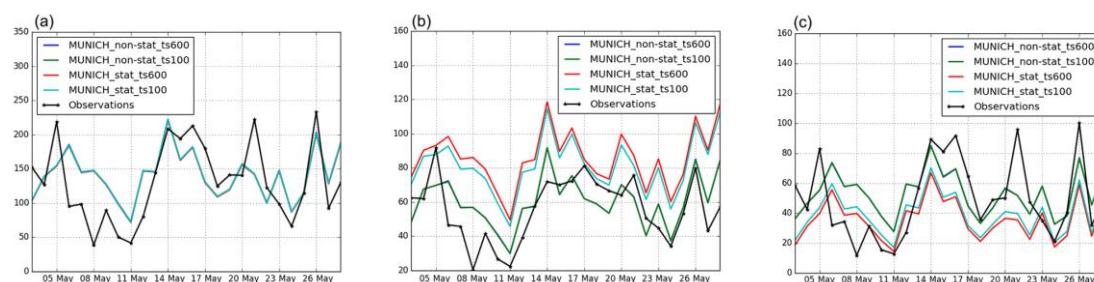

Fig R1. Daily average concentration of NO<sub>x</sub>(a), NO<sub>2</sub>(b), and NO(c) concentration ( $\mu\text{g}/\text{m}^3$ ) simulated by MUNICH in Paris with different time step (600s and 100s) using the stationary and nonstationary approaches (Lugon et al., 2020).

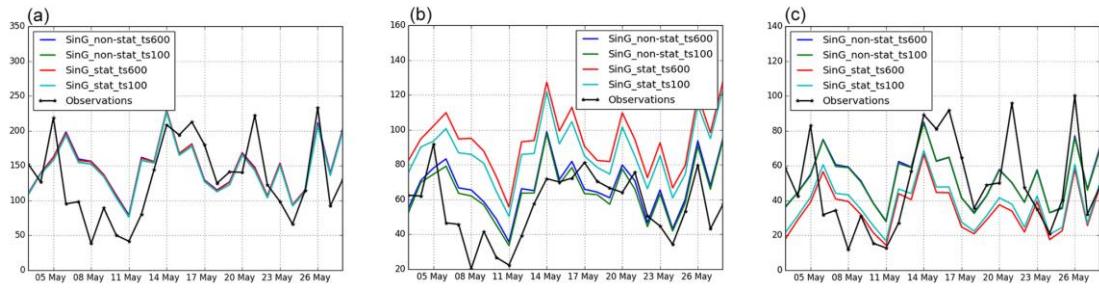

Fig R2. Daily average concentration of NO<sub>x</sub>(a), NO<sub>2</sub>(b), and NO(c) concentration ( $\mu\text{g}/\text{m}^3$ ) simulated by SinG (a multi-scale model that couples MUNICH with the regional model Polair3D) in Paris with different time step (600s and 100s) using the stationary and nonstationary approaches (Lugon et al., 2020).

In this study, the nonstationary approaches have been used in MUNICH. Based on reviewer's comments, a sensitivity test has been carried out on the time step (Delta time=20min and Delta time=5min) for the interface between NAQPMS and MUNICH to quantified the influence of time step on simulation results. As shown in Fig R3 and R4, the simulation of NO<sub>x</sub> and O<sub>3</sub> with time step 20min and 5min were close to observations at monitoring sites. The hourly simulation results at monitoring sites were compared in Fig R5. The FAC2 between simulation results of O<sub>3</sub>, NO, and NO<sub>2</sub> by time step 20min and 5min reached 0.99, 0.97 and 1.0 and The NMB of O<sub>3</sub>, NO, and NO<sub>2</sub> is 0.03, 0.11, and 0.03. Overall, the simulation results based on 20 min can achieve similar simulation accuracy with a smaller time step (5 min). The sensitive analysis with different time step (20min and 5min) were added in the revised manuscript, please see the revised manuscript from line 370 to line 377 for more details.

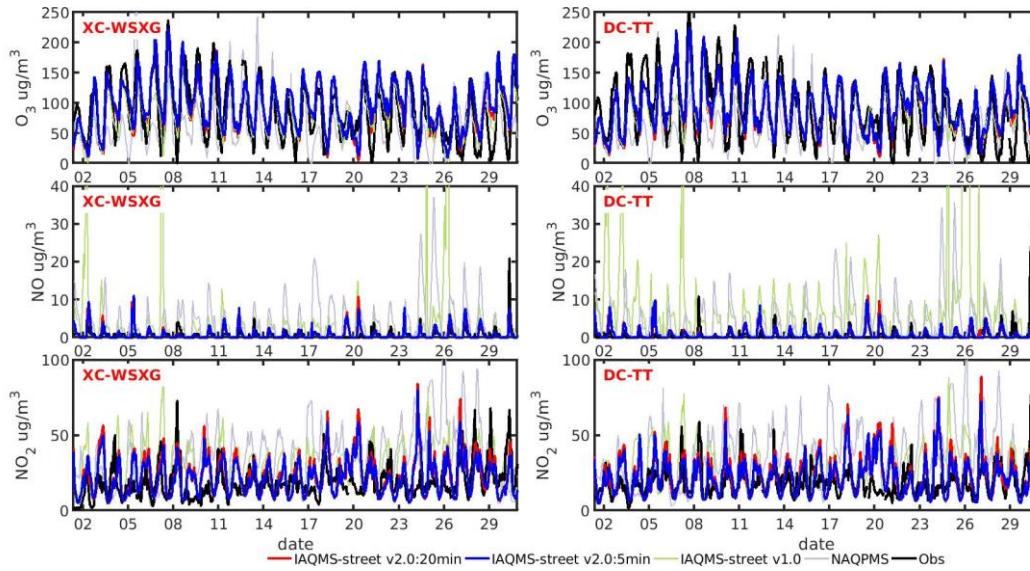

Fig R3. Hourly variation of O<sub>3</sub>, NO, and NO<sub>2</sub> concentrations (unit:  $\mu\text{g}/\text{m}^3$ ) during August 2021 at the Dongcheng-Tiantan (DC-TT) station and Xicheng-Wanshouxigong (XC-WSXG) station. Red lines indicate values simulated by IAQMS-street v2.0 with 20 min time step; blue lines indicate values simulated by IAQMS-street v2.0 with 5min time step; green lines indicate values simulated by the IAQMS-street v1.0; black lines indicate values simulated by NAQPMS; and black lines indicate observations.

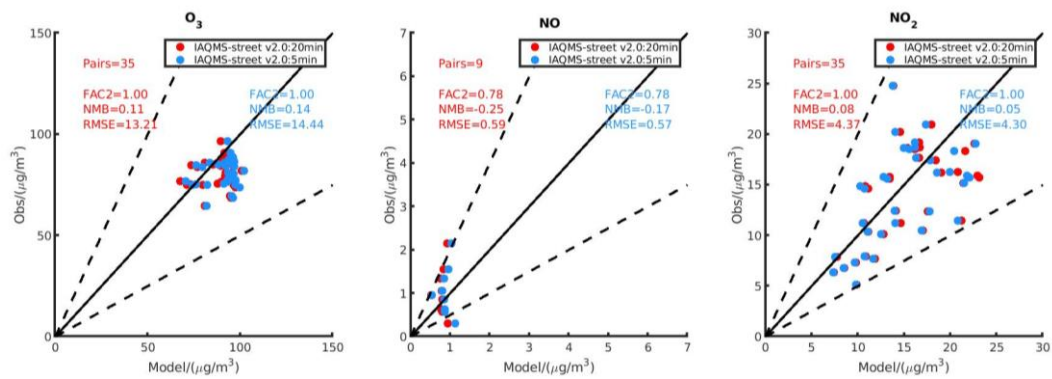

Fig R4. Observed and simulated average O<sub>3</sub>, NO, and NO<sub>2</sub> concentrations during August 2021 from IAQMS-street v 2.0 with different time step (20 min: red points; 5min: blue points) at all pollutant monitoring stations in Beijing.

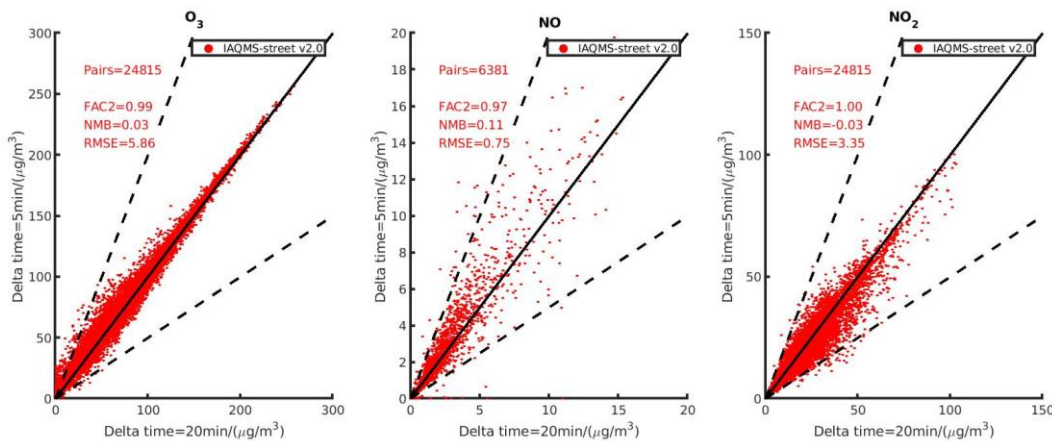

Fig R5. The comparison of simulated hourly O<sub>3</sub>, NO, and NO<sub>2</sub> concentrations during August 2021 from IAQMS-street v 2.0 with different time step (20 min and 5 min) at all pollutant monitoring stations in Beijing.

2. Figure 1. How high is the bottom layer in this study? Please provide a reasonable explanation that the simulation results are not dependent on the height of the bottom layer.

Re: In this study, the height of the bottom layer in the regional model is 48.32m over the Beijing area, and the average building height in Beijing used in this study is 10.8m. As shown in Fig R6, more than 90% of buildings in Beijing have a height below 20m, and less than 4% of buildings exceeding 50m in height, which basic meets the requirement that the height of the street model need lower than the bottom height of the regional model in two-way coupled models (Lugon et al., 2020). Based on reviewer's comments, the information of building heights and the bottom layer height of regional model in Beijing were added in the revised manuscript. please see the revised manuscript from line 174 to line 177 for more details.

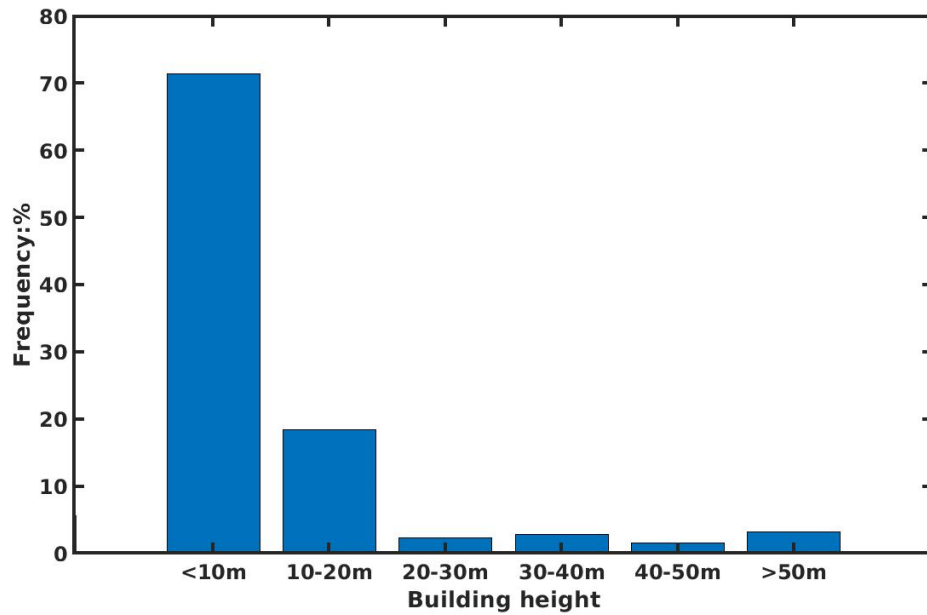

Fig R6. The frequency distribution of building height in Beijing urban area.

3. Figure 7. Why is the number of NO observations less than NO<sub>2</sub> and O<sub>3</sub>? Also, it seems that only the daily averaged data are shown. The hourly averaged data should be shown as the prediction accuracy of the peak concentration is important.

Re: In Chinese National Ambient Air Quality Standards, O<sub>3</sub>, PM<sub>2.5</sub>, PM<sub>10</sub>, CO, SO<sub>2</sub>, and NO<sub>2</sub> are listed as six conventional pollutants for monitoring, and NO is not the main monitoring object, so the NO is not observed at all national monitoring sites, which caused the NO observations less than NO<sub>2</sub> and O<sub>3</sub>, and the NO observation values are all integer digits in this study. Based on review's comment, the hourly averaged data is added in the revised manuscript (as shown in Fig R7), please see the revised manuscript from line 272 to line 273 and appendix figure (Fig. S1) for more details.

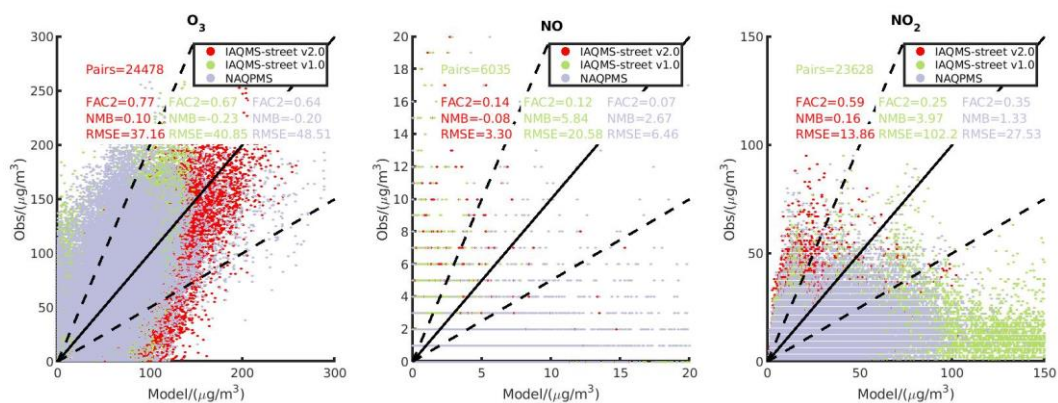

Fig R7. Observed and simulated hourly O<sub>3</sub>, NO, and NO<sub>2</sub> concentrations during August 2021 from different models (IAQMS-street v2.0: red points; IAQMS-street v1.0: green points; NAQPMS: blue points) at all pollutant monitoring stations in Beijing.

## Technical Corrections

4. IAQMS-street v2.0 could use more CPU time than IAQMS-street v1.0. It is helpful for the potential user of IAQMS-street v2.0 to know the detailed CPU time in this study for different scenarios.

Re: Based on review's comment, the calculation time of IAQMS-street v2.0 and IAQMS-street v1.0 are compared now. In this study, the NAQMS used 4 nodes and 24 ppn (Processor Per Node) when MUNICH used 1 node and 28 ppn. During the study period, the calculation time is 121.6 h in IAQMS-street v2.0 and 96.2 h in IAQMS-street v1.0, and the calculation time increased to 212.8 h in IAQMS-street v2.0 with smaller time step (5 min). The detail description of calculation time for different scenarios has been added in the revised manuscript. Please see the manuscript from line 378 to line381 for more details.

## Reference:

Lugon, L., Sartelet, K., Kim, Y., Vigneron, J., and Chretien, O.: Nonstationary modeling of NO<sub>2</sub>, NO and NO<sub>x</sub> in Paris using the Street-in-Grid model: coupling local and regional scales with a two-way dynamic approach, *Atmos. Chem. Phys.*, 20, 7717-7740, 10.5194/acp-20-7717-2020, 2020.

Date of this revision:

28 Jun 2023
